# Supplementary figures and images for: Mixed antimonate-phosphonate ligands as polydentate bridging oxygen donors
Source: Royal Society of Chemistry journal article supplement (doi:10.1039/b815270e), 2008-01-01

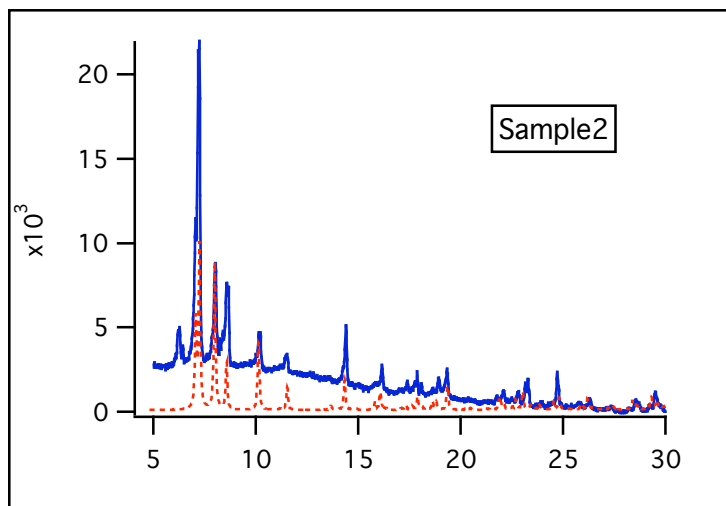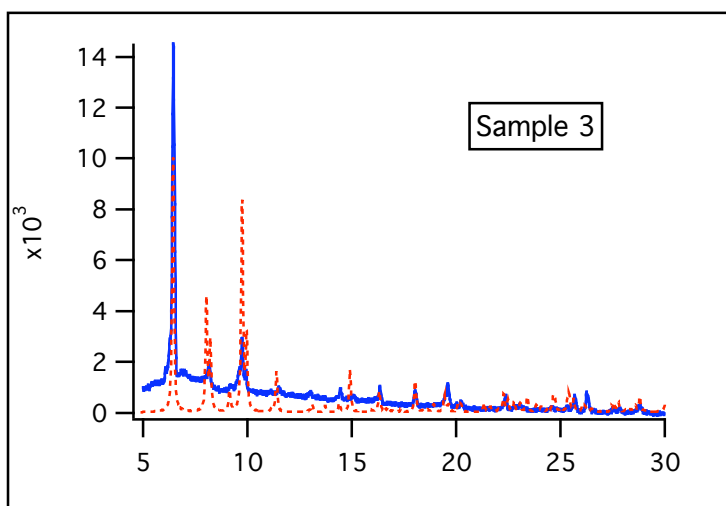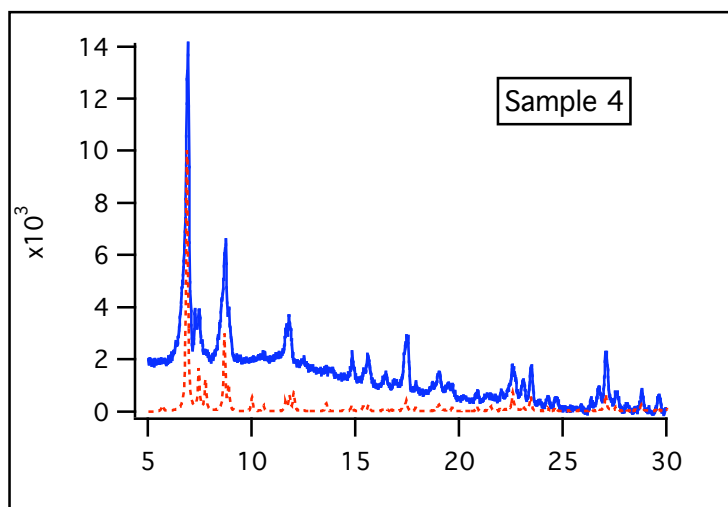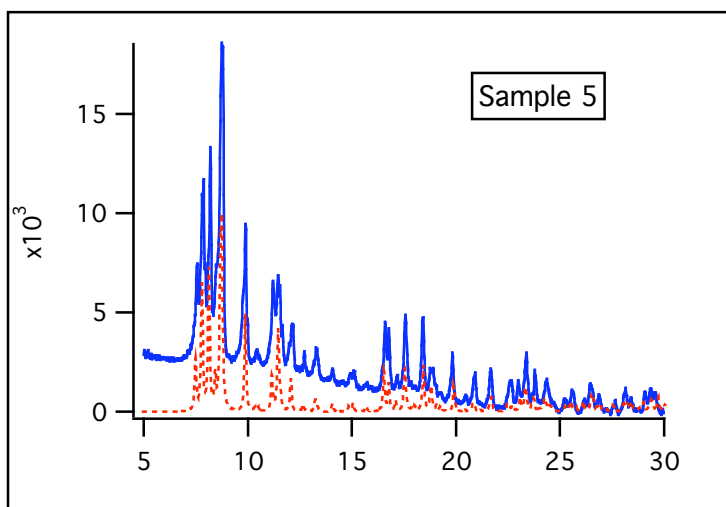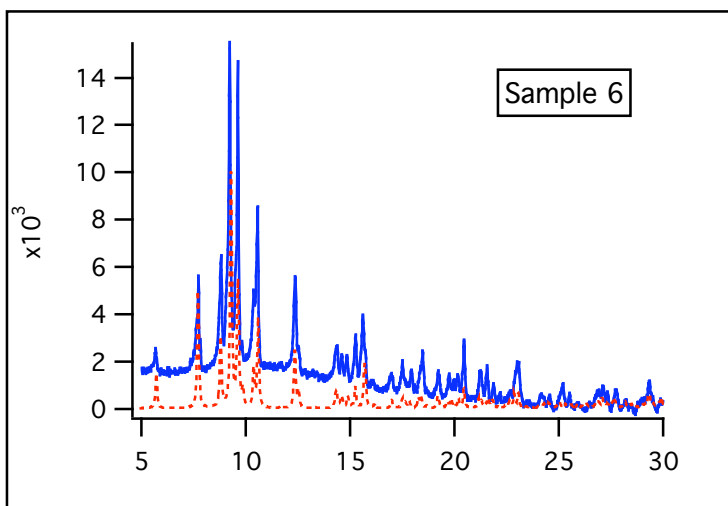

Supplement: b815270e.pdf [file b815270e.pdf]
